# Supplementary material
Source: publisher site journal article supplement (https://www.dovepress.com/article/278647)

## Schematic representation of the extraction of the compounds

Figure S1: Extraction of *Annona muricata* Ethyl Acetate

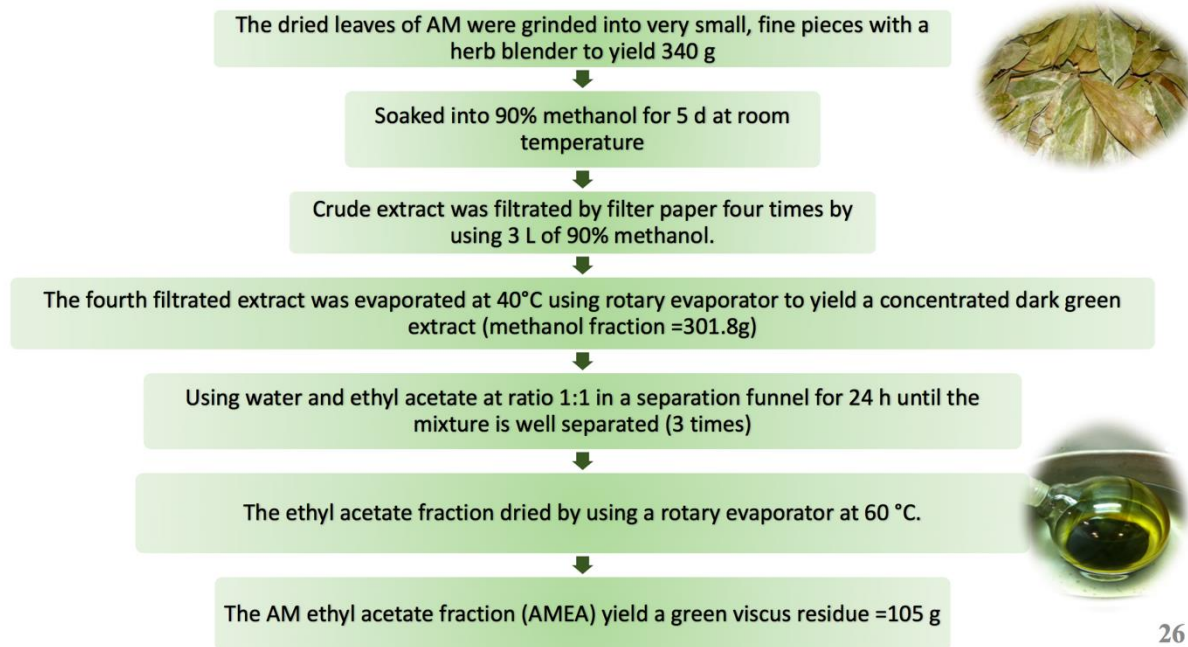

Basically, we used different methods that frequently used in plant extractions including plant tissue homogenization procedure and percolation with some modifications as following:

The dried leaves of AM were grinded into very small, fine pieces with an herb blender to yield 340 g. These grounded leaves were then soaked into 90% methanol for 5 days at room temperature. Then, this crude extract was filtered by filter paper four times by using 3 L of 90% methanol. The filtrated extract was then pooled and evaporated at 40°C using Buchi Rotavapor (Gaithersburg, MD) to yield a concentrated dark green extract. This methanol fraction was then subjected to a partition between water and ethyl acetate at ratio 1:1 in a separation funnel for 24 h or until the mixture was well separated; this step was repeated three times. After that, the ethyl acetate fraction was dried by using a rotary evaporator at 60 °C. The ethyl acetate fraction was thick green liquid residue and the final weight obtained was 105 g. This is the final AMEA extract which was used for further experiments.

## Preparation of the fractions

The ethyl acetate extract was subjected to a preparative thin layer chromatography (TLC) plate (EMD Millipore, Billerica, MA) eluted by 90% ethyl acetate and 10% hexane. From this preparative TLC plate, eight individual bands were collected as shown in Figure S2. Each band was scraped and removed from the plate and soaked in ethyl acetate for 1 day. After that, each fraction was filtered by filter paper into evaporating flask in order to be evaporated by rotary evaporator at 40 °C. All the eight fractions were then tested on the BT-20 triple negative breast cancer cell line by using MTS cell viability assay.

**Figure S2: Preparative thin layer chromatography**

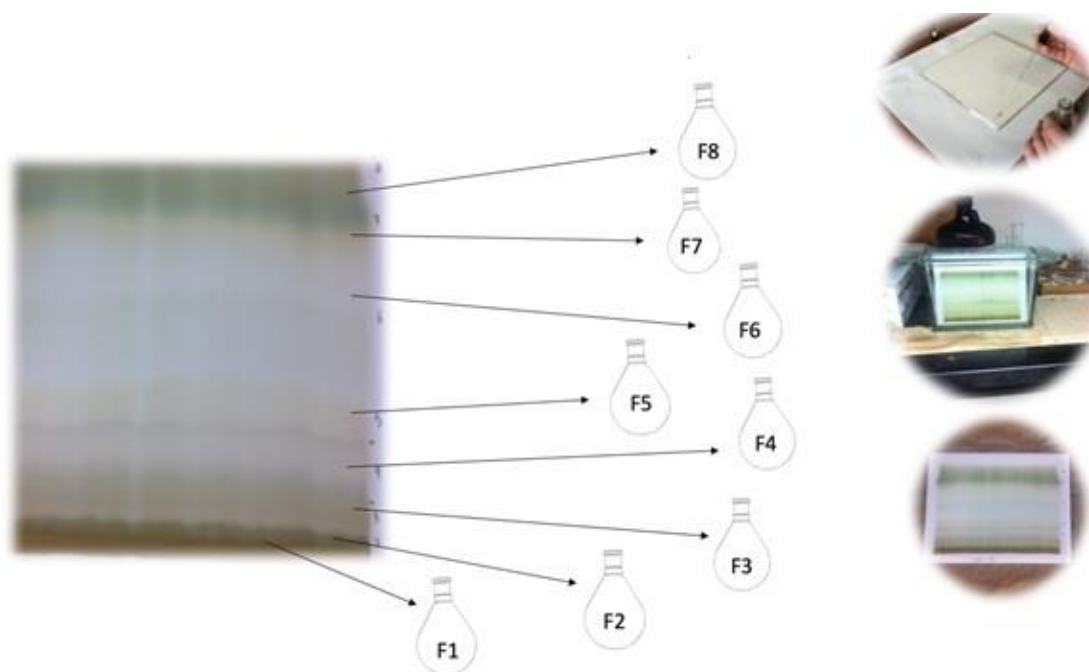

Supplement: Supplementary file 1 [file get_supplementary_file.php]
